# Supplementary material for: Enhancement of Mechanical Properties and Bonding Properties of Flake-Zinc-Powder-Modified Epoxy Resin Composites
Source: MDPI journal article supplement (doi:10.3390/polym14235323), 2022-12-05
Supplement: s1 [file s1]

## Supplementary Data

### Enhancement of mechanical properties and bonding properties of flake zinc powder modified epoxy resin composites

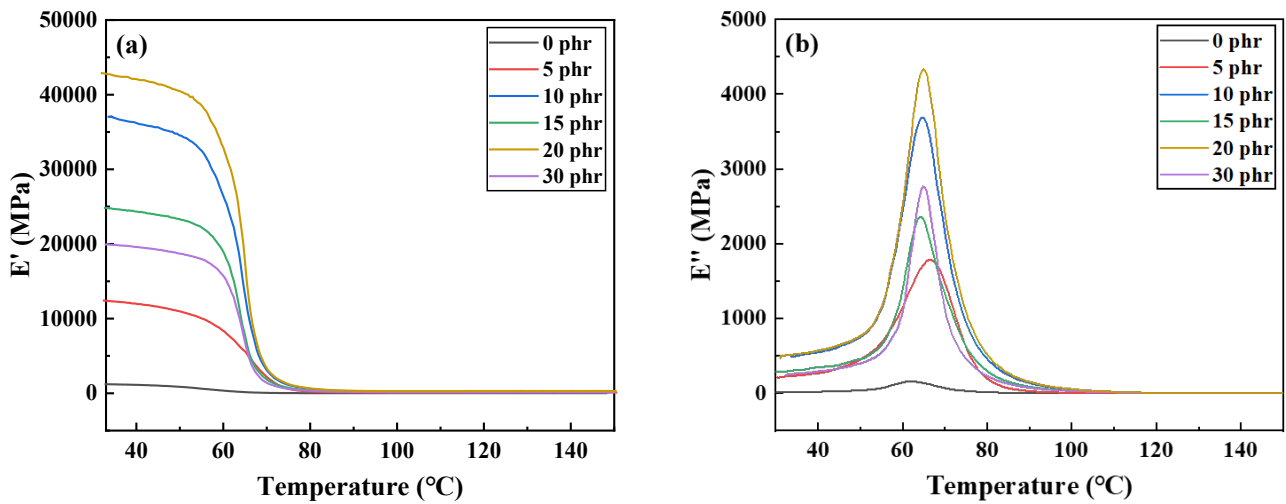

**Figure S1.** (a)  $E'$ ; (b)  $E''$  curves of CTPBA/EP epoxy resin modified with different Mf-Zn content
